# Supplementary material for: Irradiation-induced grain growth and defect evolution in nanocrystalline zirconia with doped grain boundaries
Source: Royal Society of Chemistry journal article supplement (doi:10.1039/c6cp01763k), 2016-01-01
Supplement: c6cp01763k1.pdf [file c6cp01763k1.pdf]

## Supplementary Information for: Irradiation-Induced Grain Growth and Defect Evolution in Nanocrystalline Zirconia with Doped Grain Boundaries

By: Sanchita Dey, John Mardinly, Yongqiang Wang, James A. Valdez, Terry G. Holesinger,  
Blas P. Uberuaga, Jeff J. Ditto, John W. Drazin, and Ricardo H. R. Castro\*

### Supplementary Figures:

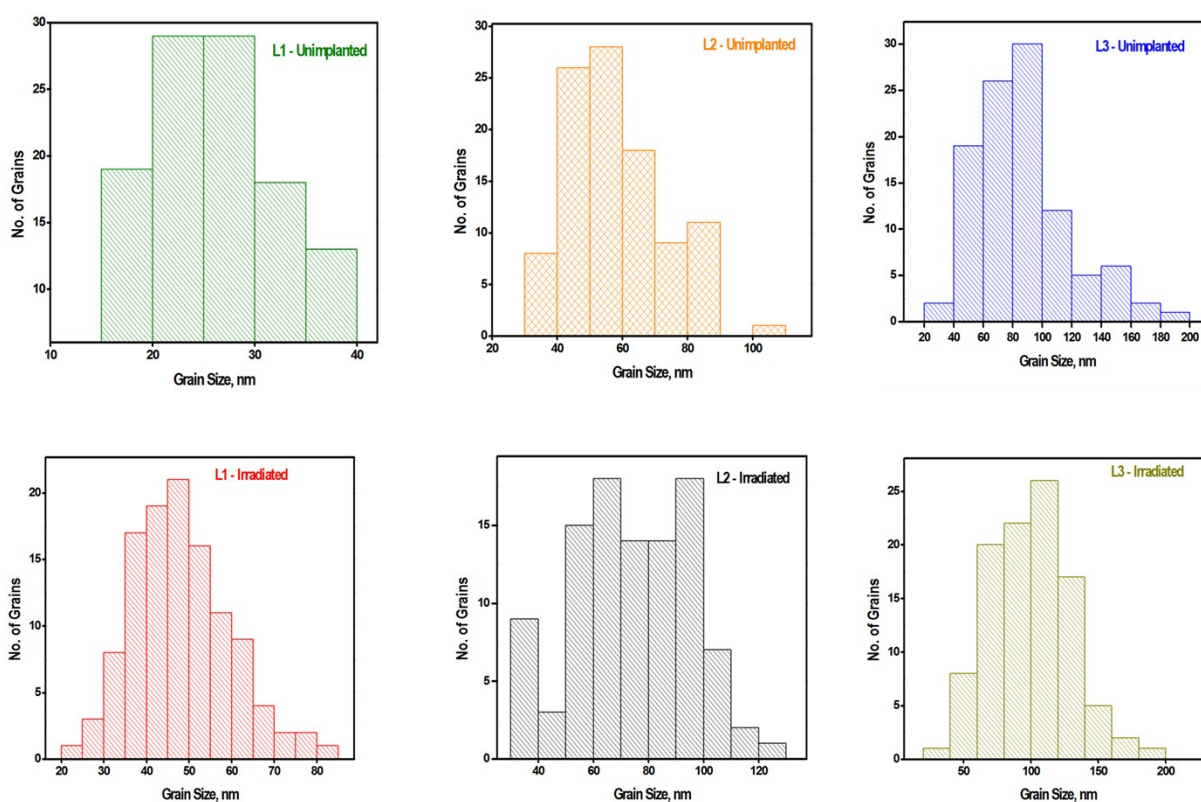

Figure S1: Particle Size distribution of 2La10YSZ samples before irradiation. Left image represent L1 sample, middle one represents L2 sample and the right one for L3 sample. All three samples showed normal distribution.

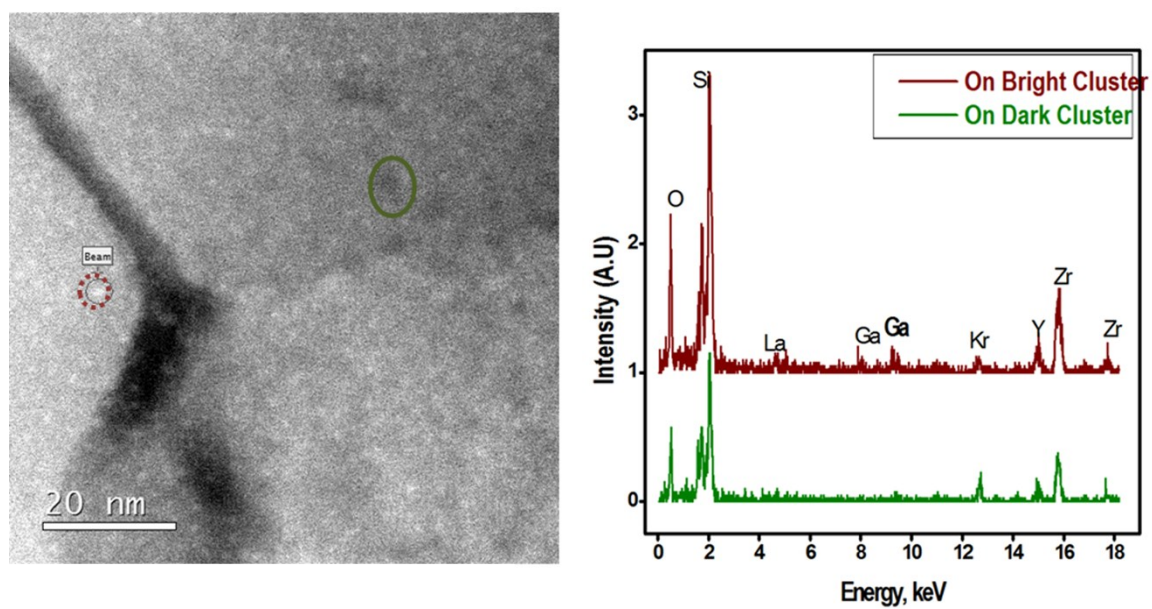

Figure S2: STEM DF image of the high-dpa zone for  $L_3$  sample. EDS spectra reveals the presence of Ga in the bright cluster.

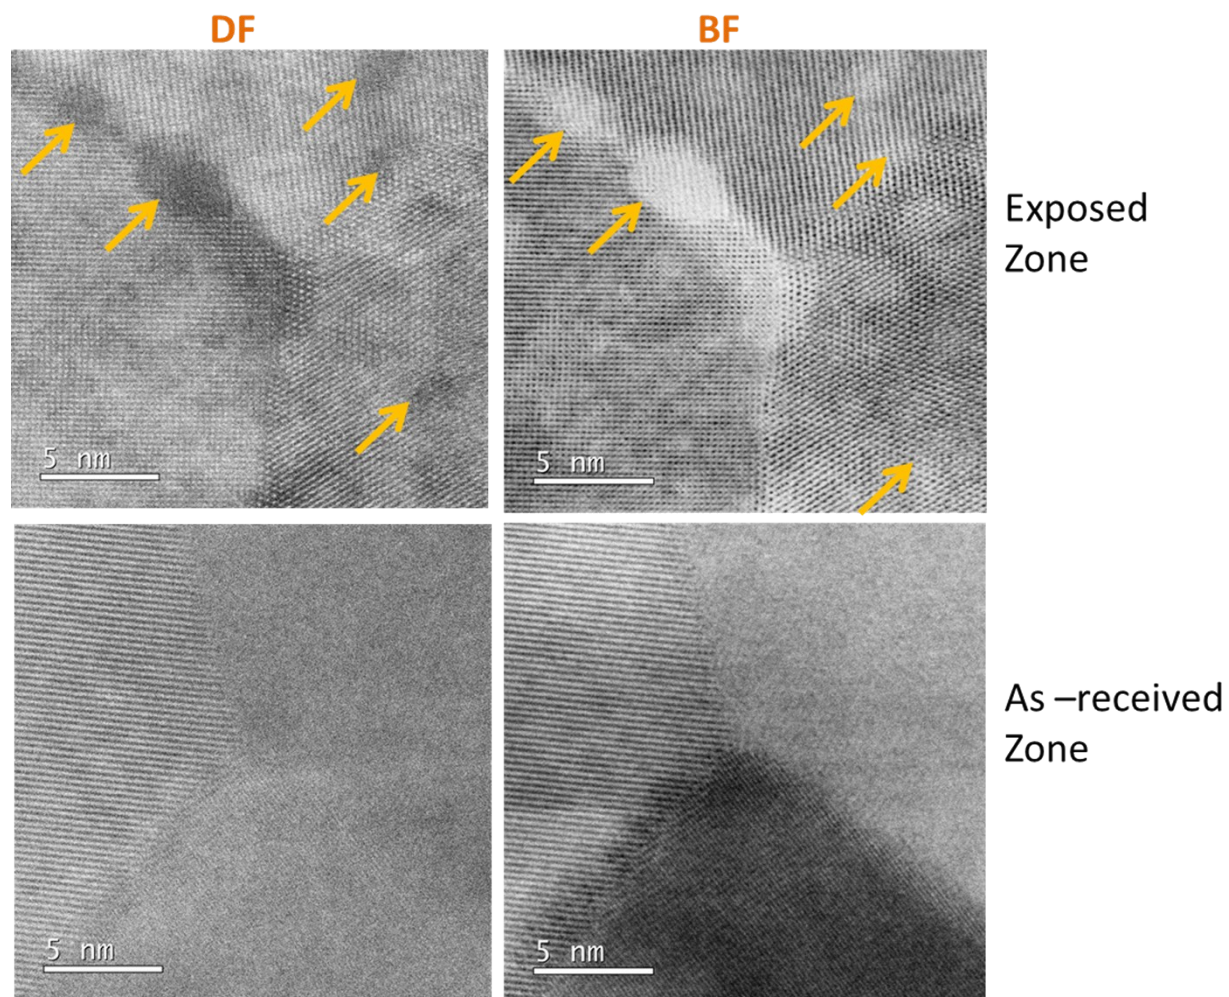

Figure S3: High resolution STEM images of the high-dpa zone and un-implanted zone in  $L_1$  sample. Arrows in the DF and BF images indicate corresponding vacancy clusters at the grain boundaries in the exposed zone and reasonably clean grain boundaries in the un-implanted zone.
